# Supplementary material
Source: PubMed Central journal article supplement (PMC3071989)
Supplement: NIHMS252063-supplement-1.pdf [file NIHMS252063-supplement-1.pdf]

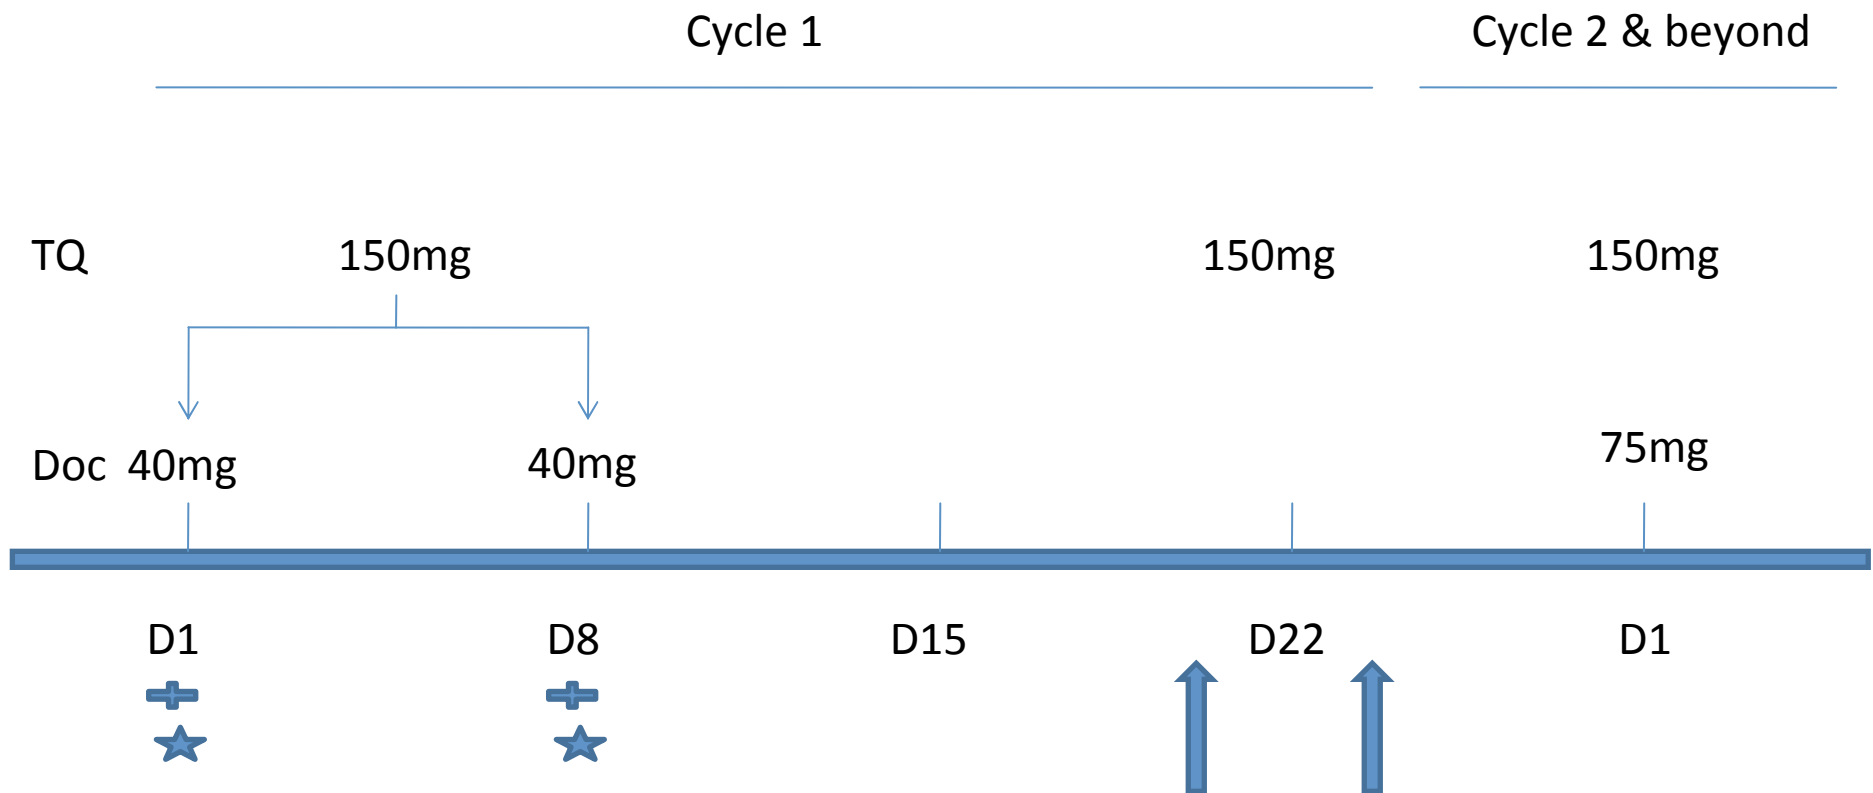

TQ = Tariquidar } Patients randomized to Docetaxel + Tariquidar on either Day 1 or Day 8  
 Doc = Docetaxel }

↑ 99mTc-sestamibi scan

+ PK = Pharmacokinetics – Prior to Docetaxel, then at time points 1hr – 24hr

★ CD56+ cells for rhodamine efflux assays - At baseline (prior to the tariquidar dose), 24 h and 48 h after the start of tariquidar infusion
