# Supplementary material
Source: PubMed Central journal article supplement (PMC3071989)
Supplement: NIHMS252063-supplement-5.pdf [file NIHMS252063-supplement-5.pdf]

## Supplemental Figure Legends

Supplemental Figure 1: Study Schema

Supplemental Figure 2: Plot of  $^{99m}\text{Tc}$ -Sestamibi uptake in an individual patient over 180 minutes. Pretreatment measurements are denoted with filled circles and solid lines.

Post-treatment measurements are shown as open circles and dashed lines. A) Heart B) Liver C) Left Lung Lesion D) Right Lung Lesion.
