# Supplementary material
Source: PubMed Central journal article supplement (PMC3071989)

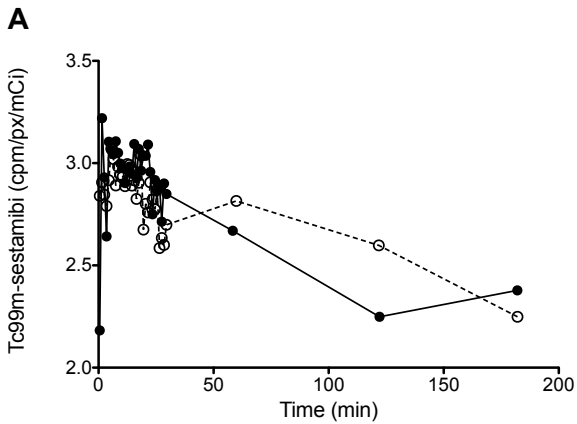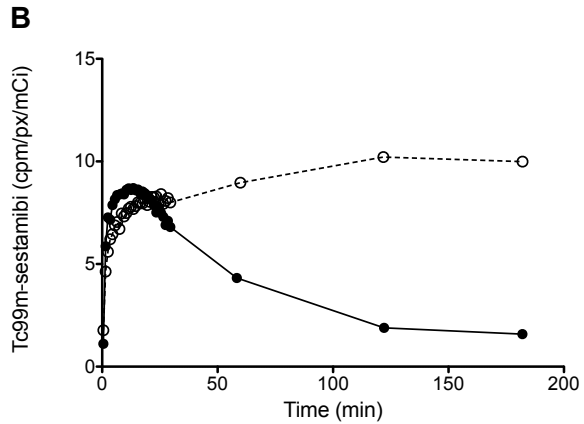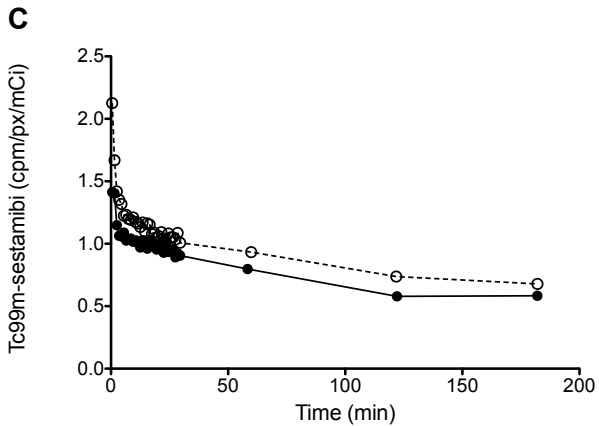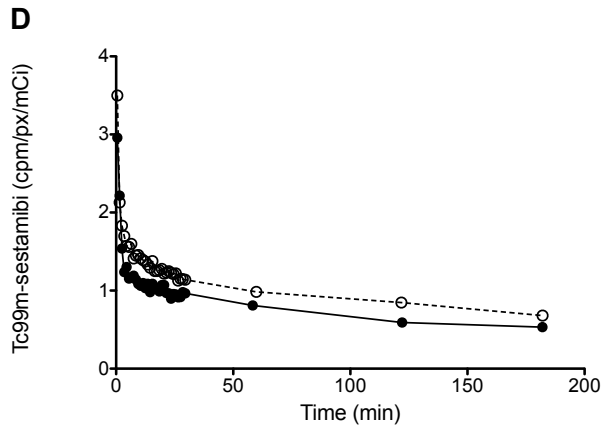

Supplement: NIHMS252063-supplement-2.pdf [file NIHMS252063-supplement-2.pdf]
